# Supplementary material for: The effectiveness of arbuscular mycorrhizal fungal species (Funneliformis mosseae, Rhizophagus intraradices, and Claroideoglomus etunicatum) in the biocontrol of root and crown rot pathogens, Fusarium solani and Fusarium mixture in pepper
Source: PeerJ. 2025 Jan 16;13:e18438. doi: 10.7717/peerj.18438 (PMC11742253; doi:10.7717/peerj.18438)
Supplement: Supplemental Information 1 [file peerj-13-18438-s001.xlsx]

## Sheet: 18FSOLANCOLON
treatment	col	treatment
negatif kontrol	0	NC
negatif kontrol	0	NC
negatif kontrol	0	NC
G.mosseae 18 F.solani	50	GM+P
G.mosseae 18 F.solani	40	GM+P
G.mosseae 18 F.solani	80	GM+P
G.intraradices 18 F.solani	60	GI+P
G.intraradices 18 F.solani	50	GI+P
G.intraradices 18 F.solani	50	GI+P
G. etunicatum 18 F.solani	80	GE+P
G. etunicatum 18 F.solani	60	GE+P
G. etunicatum 18 F.solani	100	GE+P
Mikoriza mix 18 F.solani	60	MM+P
Mikoriza mix 18 F.solani	80	MM+P
Mikoriza mix 18 F.solani	70	MM+P
G.mosseae (kontrol)	30	GM
G.mosseae (kontrol)	60	GM
G.mosseae (kontrol)	100	GM
G.intraradices (kontrol)	0	GI
G.intraradices (kontrol)	70	GI
G.intraradices (kontrol)	80	GI
G.etunicatum (kontrol)	20	GE
G.etunicatum (kontrol)	50	GE
G.etunicatum (kontrol)	30	GE
Mikoriza mix (Kontrol)	70	MM
Mikoriza mix (Kontrol)	60	MM

## Sheet: 48FSOL
treatment	col	treatment
negatif kontrol	0	NC
negatif kontrol	0	NC
negatif kontrol	0	NC
G.mosseae 48 F.solani	80	GM+P
G.mosseae 48 F.solani	40	GM+P
G.mosseae 48 F.solani	70	GM+P
G.intraradices 48 F.solani	30	GI+P
G.intraradices 48 F.solani	70	GI+P
G.intraradices 48 F.solani	60	GI+P
G. etunicatum 48 F.solani	60	GE+P
G. etunicatum 48 F.solani	80	GE+P
G. etunicatum 48 F.solani	50	GE+P
Mikoriza mix 48 F.solani	40	MM+P
Mikoriza mix 48 F.solani	90	MM+P
Mikoriza mix 48 F.solani	60	MM+P
G.mosseae (kontrol)	30	GM
G.mosseae (kontrol)	60	GM
G.mosseae (kontrol)	100	GM
G.intraradices (kontrol)	0	GI
G.intraradices (kontrol)	70	GI
G.intraradices (kontrol)	80	GI
G.etunicatum (kontrol)	20	GE
G.etunicatum (kontrol)	50	GE
G.etunicatum (kontrol)	30	GE
Mikoriza mix (Kontrol)	70	MM
Mikoriza mix (Kontrol)	60	MM

## Sheet: 50MIX
treatment	col	treatment
negatif kontrol	0	NC
negatif kontrol	0	NC
negatif kontrol	0	NC
G.mosseae 50 mix	60	GM+P
G.mosseae 50 mix	70	GM+P
G.mosseae 50 mix	40	GM+P
G.intraradices 50 mix	90	GI+P
G.intraradices 50 mix	50	GI+P
G.intraradices 50 mix	80	GI+P
G.etunicatum 50 mix	30	GE+P
G.etunicatum 50 mix	50	GE+P
G.etunicatum 50 mix	90	GE+P
Mikoriza mix 50 mix	100	MM+P
Mikoriza mix 50 mix	80	MM+P
Mikoriza mix 50 mix	100	MM+P
G.mosseae (kontrol)	30	GM
G.mosseae (kontrol)	60	GM
G.mosseae (kontrol)	100	GM
G.intraradices (kontrol)	0	GI
G.intraradices (kontrol)	70	GI
G.intraradices (kontrol)	80	GI
G.etunicatum (kontrol)	20	GE
G.etunicatum (kontrol)	50	GE
G.etunicatum (kontrol)	30	GE
Mikoriza mix (Kontrol)	70	MM
Mikoriza mix (Kontrol)	60	MM

## Sheet: 147MIX
treatment	col	treatment
negatif kontrol	0	NC
negatif kontrol	0	NC
negatif kontrol	0	NC
G. mosseae 147 mix	10	GM+P
G. mosseae 147 mix	30	GM+P
G.intraradices 147 mix	60	GI+P
G.intraradices 147 mix	70	GI+P
G.intraradices 147 mix	60	GI+P
G.etunicatum 147 mix	40	GE+P
G.etunicatum 147 mix	90	GE+P
G.etunicatum 147 mix	20	GE+P
Mikoriza mix 147 mix	70	MM+P
Mikoriza mix 147 mix	90	MM+P
Mikoriza mix 147 mix	50	MM+P
G.mosseae (kontrol)	30	GM
G.mosseae (kontrol)	60	GM
G.mosseae (kontrol)	100	GM
G.intraradices (kontrol)	0	GI
G.intraradices (kontrol)	70	GI
G.intraradices (kontrol)	80	GI
G.etunicatum (kontrol)	20	GE
G.etunicatum (kontrol)	50	GE
G.etunicatum (kontrol)	30	GE
Mikoriza mix (Kontrol)	70	MM
Mikoriza mix (Kontrol)	60	MM
