# Supplementary material for: The effectiveness of arbuscular mycorrhizal fungal species (Funneliformis mosseae, Rhizophagus intraradices, and Claroideoglomus etunicatum) in the biocontrol of root and crown rot pathogens, Fusarium solani and Fusarium mixture in pepper
Source: PeerJ. 2025 Jan 16;13:e18438. doi: 10.7717/peerj.18438 (PMC11742253; doi:10.7717/peerj.18438)
Supplement: Supplemental Information 2 [file peerj-13-18438-s002.xlsx]

## Sheet: 18FSOL
treatments	ph	ec	fosfor	potasyum	cu	fe	mn	zn		treatment	totalnitrogen
pathogen	6.11	0.26	49.35	58.8	0.407	16.92	1.48	1.107		CN	3.09
pathogen	6.29	0.25	51.91	88.5	0.462	14.36	1.851	1.252		CN	3.176
pathogen	5.79	0.27	51.17	119.7	0.535	12.63	1.521	1.431		CN	3.866
gmp	6.62	0.3	68.88	80.7	0.44	13.44	1.278	1.256		CN	4.435
gmp	5.81	0.26	65.59	77.1	0.445	11.86	0.963	1.122		CN	3.675
gmp	6.53	0.24	60.31	75	0.391	9.967	0.886	1.051		CN	3.395
gip	5.96	0.36	65.75	78.3	0.64	11.65	1.622	1.776		CP	3.705
gip	6.03	0.39	66	90.3	0.612	23.25	2.755	1.723		CP	3.611
gip	6.09	0.3	69.38	84.3	0.422	15.28	1.434	1.316		CP	4.627
gep	6.63	0.31	43.17	77.4	0.569	8.543	2.044	1.376		GM+P	2.65
gep	6.29	0.2	82.72	69	0.38	13.96	1.303	1.366		GM+P	4.465
gep	6.46	0.27		98.1	0.742	24.62	2.81	2.075		GM+P	3.956
mmp	5.98	0.21	72.1	255	0.685	21.82	3.321	2.139		GI+P	5.472
mmp	6.4	0.25	75.64	292.2	0.636	19.37	2.734	1.833		GI+P	4.636
mmp	6.05	0.2	82.23	195.9	0.611	10.7	2.074	1.513		GI+P	4.976
controlneg	6.27	0.29	63.61	55.5	0.883	15.84	1.99	1.222		GE+P	3.916
controlneg	6.3	0.37	72.75	87	0.438	13.8	1.253	0.937		GE+P	2.504
controlneg	6.2	0.41	68.3	76.8	0.658	14.37	1.795	1.327		GE+P	5.248
controlneg	6.19	0.21	71.11	67.5	0.739	13.67	1.497	1.258		MM+P	4.828
controlneg	6.32	0.36	74.81	90.6	0.669	14.77	1.8	1.31		MM+P	6.162
controlneg	6.31	0.26	66.99	76.8	0.385	12.72	1.331	1.056		MM+P	5.644
gm	6.49	0.24	75.39	80.4	0.529	17.62	2.165	1.606		GM	7.199
gm	6.07	0.35	69.62	62.7	0.373	13.36	1.012	1.201		GM	4.724
gm	6.25	0.27	59.41	64.2	0.412	13.57	1.096	5.132		GI	3.282
gm	6.1	0.91	52.37	76.2	0.443	14.76	1.266	1.332		GI	4.959
gi	6.3	0.77	57.92	74.7	0.454	17.82	1.617	1.503		GI	2.472
gi	6.23	0.27	78.85	75.9	0.655	23.83	2.717	1.766		GI	2.81
gi	5.38	0.44	58.75	70.5	0.717	15.33	1.728	1.756		GE	2.713
ge	6.1	0.41	35.84	48.9	0.459	16.65	1.617	1.478		GE	3.054
ge	6.09	0.18	35.84	32.4	0.41	16.22	1.463	1.269		GE	2.028
ge	6.07	0.22	31.88	57.3	0.4	16.22	1.73	1.273		GE	3.587
mm	6.4	0.29	66.82	188.1	0.618	10.23	1.497	1.561		MM	2.433
mm	6.85	0.28	68.06	194.1	0.544	12.24	1.533	1.214		MM	2.693
mm	6.37	0.23	58.25	179.7	0.735	26.87	3.547	2.332

## Sheet: 48FSOL
groups	ph	ec	fosfor	potasyum	cu	fe	mn	zn		treatment	totalnitrogen
pathogen	6.15	0.35	86.19	123.6	0.642	11.3	2.339	1.652		Control	3.09
pathogen	6.41	0.33	68.55	190.5	0.565	13.33	2.412	1.234		Control	3.176
pathogen	6.69	0.36	35.59	102	0.71	25.05	3.236	1.767		Control	3.866
gmp	6.69	0.28	69.87	80.7	0.41	10.49	0.813	1.06		Control	4.435
gmp	6.3	0.29	45.07	117.6	0.478	11.11	1.08	1.167		Control	3.675
gmp	6.75	0.28	76.63	148.8	0.643	23.46	2.886	1.984		Control	3.395
gip	5.42	0.3	51.17	143.7	0.589	22.45	2.933	1.813		gmp	5.17
gip	6.79	0.25	68.88	115.5	0.655	10.7	1.624	1.588		gmp	3.153
gip	6.18	0.25	68.55	97.5	0.635	12.51	1.742	1.541		gip	5.089
gep	5.87	0.31	56.03	81.3	0.512	16.81	1.938	1.526		gip	2.17
gep	5.84	0.23	73.5	83.1	0.633	23	2.616	1.934		gip	4.196
gep	6.03	0.24	62.12	86.7	0.671	22.08	2.554	1.998		gep	5.991
mmp	6.97	0.22	83.71	135.6	0.339	11.37	1.151	1.221		gep	2.821
mmp	6.13	0.33	95.5	104.1	0.585	9.216	1.336	1.597		mmp	5.618
mmp	6.43	0.81	61.47	81	0.427	15.44	1.503	1.484		mmp	5.618
controlneg	6.27	0.29	63.61	55.5	0.883	15.84	1.99	1.222		gm	7.199
controlneg	6.3	0.37	72.75	87	0.438	13.8	1.253	0.937		gm	4.724
controlneg	6.2	0.41	68.3	76.8	0.658	14.37	1.795	1.327		gi	3.282
controlneg	6.19	0.21	71.11	67.5	0.739	13.67	1.497	1.258		gi	4.959
controlneg	6.32	0.36	74.81	90.6	0.669	14.77	1.8	1.31		gi	2.472
controlneg	6.31	0.26	66.99	76.8	0.385	12.72	1.331	1.056		gi	2.81
gm	6.49	0.24	75.39	80.4	0.529	17.62	2.165	1.606		ge	2.713
gm	6.07	0.35	69.62	62.7	0.373	13.36	1.012	1.201		ge	3.054
gm	6.25	0.27	59.41	64.2	0.412	13.57	1.096	5.132		ge	2.028
gm	6.1	0.91	52.37	76.2	0.443	14.76	1.266	1.332		ge	3.587
gi	6.3	0.77	57.92	74.7	0.454	17.82	1.617	1.503		mm	2.433
gi	6.23	0.27	78.85	75.9	0.655	23.83	2.717	1.766		mm	2.693
gi	5.38	0.44	58.75	70.5	0.717	15.33	1.728	1.756
ge	6.1	0.41	35.84	48.9	0.459	16.65	1.617	1.478
ge	6.09	0.18	35.84	32.4	0.41	16.22	1.463	1.269
ge	6.07	0.22	31.88	57.3	0.4	16.22	1.73	1.273
mm	6.4	0.29	66.82	188.1	0.618	10.23	1.497	1.561
mm	6.85	0.28	68.06	194.1	0.544	12.24	1.533	1.214
mm	6.37	0.23	58.25	179.7	0.735	26.87	3.547	2.332

## Sheet: 50MIX
groups	ph	ec	fosfor	potasyum	cu	fe	mn	zn		treatment	totalnitrogen
pathogen	5.79	0.33	46.96	118.5	0.595	14.71	3.131	1.691		control	3.09
pathogen	6.61	0.59	87.01	133.8	0.586	21.81	2.61	1.518		control	3.176
pathogen	5.99	0.26	57.35	74.1	0.473	18.48	1.925	1.402		control	3.866
gmp	6.03	0.33	50.09	73.2	0.435	17.61	1.425	1.499		control	4.435
gmp	6.39	0.5	64.02	76.8	0.434	10.53	1.194	1.114		control	3.675
gmp	6.41	0.49	71.27	77.4	0.519	12.12	1.145	1.265		control	3.395
gip	5.61	0.6	76.63	92.1	0.7	19.39	2.734	2.007		mm	3.858
gip	5.56	0.62	73.33	136.5	0.633	23.21	3.141	1.967		mm	2.825
gip	5.67	0.89	72.75	145.2	0.582	21.96	3.007	1.947		mm	2.395
gep	6.07	0.23	61.14	56.4	0.322	13.89	1.318	1.076		mm	2.609
gep	6.03	0.29	41.52	37.2	0.387	15.31	1.419	1.232		gmp	6.498
gep	6.02	0.32	44.57	68.4	0.45	17	1.727	1.68		gmp	3.277
mmp	6.94	0.4	72.84	123	0.458	16.01	1.219	1.368		gmp	5.015
mmp	6.04	0.19	65.59	207.6	0.576	20.14	2.31	1.827		gip	3.828
mmp	6.87	0.28	75.47	200.1	0.6	20.75	2.494	1.785		gip	5.801
controlneg	6.27	0.29	63.61	55.5	0.883	15.84	1.99	1.222		gip	5.413
controlneg	6.3	0.37	72.75	87	0.438	13.8	1.253	0.937		gep	5.413
controlneg	6.2	0.41	68.3	76.8	0.658	14.37	1.795	1.327		gep	4.229
controlneg	6.19	0.21	71.11	67.5	0.739	13.67	1.497	1.258		gep	3.268
controlneg	6.32	0.36	74.81	90.6	0.669	14.77	1.8	1.31		gep	3.05
controlneg	6.31	0.26	66.99	76.8	0.385	12.72	1.331	1.056		mmp	5.481
gm	6.49	0.24	75.39	80.4	0.529	17.62	2.165	1.606		mmp	5.481
gm	6.07	0.35	69.62	62.7	0.373	13.36	1.012	1.201		gm	7.199
gm	6.25	0.27	59.41	64.2	0.412	13.57	1.096	5.132		gm	4.724
gm	6.1	0.91	52.37	76.2	0.443	14.76	1.266	1.332		gi	3.282
gi	6.3	0.77	57.92	74.7	0.454	17.82	1.617	1.503		gi	4.959
gi	6.23	0.27	78.85	75.9	0.655	23.83	2.717	1.766		gi	2.472
gi	5.38	0.44	58.75	70.5	0.717	15.33	1.728	1.756		gi	2.81
ge	6.1	0.41	35.84	48.9	0.459	16.65	1.617	1.478		ge	2.713
ge	6.09	0.18	35.84	32.4	0.41	16.22	1.463	1.269		ge	3.054
ge	6.07	0.22	31.88	57.3	0.4	16.22	1.73	1.273		ge	2.028
mm	6.4	0.29	66.82	188.1	0.618	10.23	1.497	1.561		ge	3.587
mm	6.85	0.28	68.06	194.1	0.544	12.24	1.533	1.214		mm	2.433
mm	6.37	0.23	58.25	179.7	0.735	26.87	3.547	2.332		mm	2.693

## Sheet: 147MIX
groups	ph	ec	fosfor	potasyum	cu	fe	mn	zn		treatments	totalnitrogen
pathogen	5.99	0.3	54.05	105.3	0.676	11.69	1.942	1.496		control	3.09
pathogen	5.96	0.24	86.19	119.1	0.702	24.74	3.099	1.591		control	3.176
pathogen	5.41	0.25	73	120	0.684	26.69	3.519	1.914		control	3.866
gmp	6.28	0.19	67.89	102.3	0.465	12.25	1.282	1.229		control	4.435
gmp	5.99	0.2	73.13	78.6	0.41	12.78	1.18	1.133		control	3.675
gmp	6.42	0.5	92.12	314.4	0.446	14	1.832	1.414		control	3.395
gip	5.92	0.87	64.51	87.6	0.612	21.97	2.619	1.722		pathogen	3.854
gip	5.44	0.54	57.35	131.7	0.725	15.18	1.774	2.064		pathogen	5.012
gip	6.84	0.44	76.66	184.8	0.687	26.61	4.253	2.236		pathogen	3.561
gep	6.13	0.27	44.82	118.8	0.43	16.54	1.451	1.425		pathogen	5.413
gep	6.5	0.51	36.5	104.7	0.663	9.514	1.899	1.664		gmp	4.2
gep	6.15	0.35	31.8	59.1	0.68	10.46	1.748	1.727		gmp	3.269
mmp	6	0.22	78.11	62.1	0.659	20.43	2.495	1.811		gip	3.761
mmp	6.23	0.62	63.86	129.9	0.417	15.66	1.488	1.46		gip	5.305
mmp	6.02	0.27	66.9	112.5	0.015	0.238	0.01	1.828		gip	4.638
controlneg	6.27	0.29	63.61	55.5	0.883	15.84	1.99	1.222		gep	1.837
controlneg	6.3	0.37	72.75	87	0.438	13.8	1.253	0.937		gep	2.45
controlneg	6.2	0.41	68.3	76.8	0.658	14.37	1.795	1.327		mmp	4.181
controlneg	6.19	0.21	71.11	67.5	0.739	13.67	1.497	1.258		mmp	4.181
controlneg	6.32	0.36	74.81	90.6	0.669	14.77	1.8	1.31		gm	7.199
controlneg	6.31	0.26	66.99	76.8	0.385	12.72	1.331	1.056		gm	4.724
gm	6.49	0.24	75.39	80.4	0.529	17.62	2.165	1.606		gi	3.282
gm	6.07	0.35	69.62	62.7	0.373	13.36	1.012	1.201		gi	4.959
gm	6.25	0.27	59.41	64.2	0.412	13.57	1.096	5.132		gi	2.472
gm	6.1	0.91	52.37	76.2	0.443	14.76	1.266	1.332		gi	2.81
gi	6.3	0.77	57.92	74.7	0.454	17.82	1.617	1.503		ge	2.713
gi	6.23	0.27	78.85	75.9	0.655	23.83	2.717	1.766		ge	3.054
gi	5.38	0.44	58.75	70.5	0.717	15.33	1.728	1.756		ge	2.028
ge	6.1	0.41	35.84	48.9	0.459	16.65	1.617	1.478		ge	3.587
ge	6.09	0.18	35.84	32.4	0.41	16.22	1.463	1.269		mm	2.433
ge	6.07	0.22	31.88	57.3	0.4	16.22	1.73	1.273		mm	2.693
mm	6.4	0.29	66.82	188.1	0.618	10.23	1.497	1.561
mm	6.85	0.28	68.06	194.1	0.544	12.24	1.533	1.214
mm	6.37	0.23	58.25	179.7	0.735	26.87	3.547	2.332
