# Supplementary material for: The effectiveness of arbuscular mycorrhizal fungal species (Funneliformis mosseae, Rhizophagus intraradices, and Claroideoglomus etunicatum) in the biocontrol of root and crown rot pathogens, Fusarium solani and Fusarium mixture in pepper
Source: PeerJ. 2025 Jan 16;13:e18438. doi: 10.7717/peerj.18438 (PMC11742253; doi:10.7717/peerj.18438)
Supplement: Supplemental Information 3 [file peerj-13-18438-s003.xlsx]

## Sheet: 18FSOL
treatment	numberofspores
negatif kontrol	0
negatif kontrol	0
negatif kontrol	0
G.mosseae(kontrol)	2
G.mosseae(kontrol)	3
G.mosseae(kontrol)	6
G.intraradices (kontrol)	8
G.intraradices (kontrol)	9
G.intraradices (kontrol)	6
G.etunicatum (kontrol)	17
G.etunicatum (kontrol)	9
G.etunicatum (kontrol)	3
Mikoriza mix (kontrol)	10
Mikoriza mix (kontrol)	15
Mikoriza mix (kontrol)	13
G.mosseae 18 F.solani	4
G.mosseae 18 F.solani	8
G.mosseae 18 F.solani	2
G.intraradices 18 F.solani	8
G.intraradices 18 F.solani	9
G.intraradices 18 F.solani	6
G.etunicatum 18 F.solani	5
G.etunicatum 18 F.solani	8
G.etunicatum 18 F.solani	11
Mikoriza mix 18 F.solani	2
Mikoriza mix 18 F.solani	12
Mikoriza mix 18 F.solani	6

## Sheet: 48FSOL
treatment	numberofspores
negatif kontrol	0
negatif kontrol	0
negatif kontrol	0
G.mosseae(kontrol)	2
G.mosseae(kontrol)	3
G.mosseae(kontrol)	6
G.intraradices (kontrol)	8
G.intraradices (kontrol)	9
G.intraradices (kontrol)	6
G.etunicatum (kontrol)	17
G.etunicatum (kontrol)	9
G.etunicatum (kontrol)	3
Mikoriza mix (kontrol)	10
Mikoriza mix (kontrol)	15
Mikoriza mix (kontrol)	13
G.mosseae 48 F.solani	8
G.mosseae 48 F.solani	9
G.mosseae 48 F.solani	4
G.intraradices 48 F.solani	4
G.intraradices 48 F.solani	5
G.intraradices 48 F.solani	7
G.etunicatum 48 F.solani	12
G.etunicatum 48 F.solani	7
G.etunicatum 48 F.solani	13
Mikoriza mix 48 F.solani	9
Mikoriza mix 48 F.solani	16
Mikoriza mix 48 F.solani	9

## Sheet: 50MIX
treatment	numberofspores
negatif kontrol	0
negatif kontrol	0
negatif kontrol	0
G.mosseae(kontrol)	2
G.mosseae(kontrol)	3
G.mosseae(kontrol)	6
G.intraradices (kontrol)	8
G.intraradices (kontrol)	9
G.intraradices (kontrol)	6
G.etunicatum (kontrol)	17
G.etunicatum (kontrol)	9
G.etunicatum (kontrol)	3
Mikoriza mix (kontrol)	10
Mikoriza mix (kontrol)	15
Mikoriza mix (kontrol)	13
G.mosseae 50 mix	7
G.mosseae 50 mix	22
G.mosseae 50 mix	9
G.intraradices 50 mix	7
G.intraradices 50 mix	9
G.intraradices 50 mix	6
G.etunicatum 50 mix	6
G.etunicatum 50 mix	8
G.etunicatum 50 mix	7
Mikoriza mix 50 mix	5
Mikoriza mix 50 mix	15
Mikoriza mix 50 mix	9

## Sheet: 147MIX
treatment	numberofspores
negatif kontrol	0
negatif kontrol	0
negatif kontrol	0
G.mosseae(kontrol)	2
G.mosseae(kontrol)	3
G.mosseae(kontrol)	6
G.intraradices (kontrol)	8
G.intraradices (kontrol)	9
G.intraradices (kontrol)	6
G.etunicatum (kontrol)	17
G.etunicatum (kontrol)	9
G.etunicatum (kontrol)	3
Mikoriza mix (kontrol)	10
Mikoriza mix (kontrol)	15
Mikoriza mix (kontrol)	13
G.mosseae 147 mix	14
G.mosseae 147 mix	4
G.mosseae 147 mix	9
G.intraradices 147 mix	4
G.intraradices 147 mix	14
G.intraradices 147 mix	14
G.etunicatum 147 mix	7
G.etunicatum 147 mix	6
G.etunicatum 147 mix	7
Mikoriza mix 147 mix	13
Mikoriza mix 147 mix	17
Mikoriza mix 147 mix	7
