# Supplementary material for: The effectiveness of arbuscular mycorrhizal fungal species (Funneliformis mosseae, Rhizophagus intraradices, and Claroideoglomus etunicatum) in the biocontrol of root and crown rot pathogens, Fusarium solani and Fusarium mixture in pepper
Source: PeerJ. 2025 Jan 16;13:e18438. doi: 10.7717/peerj.18438 (PMC11742253; doi:10.7717/peerj.18438)
Supplement: Supplemental Information 4 [file peerj-13-18438-s004.xlsx]

## Sheet: 18FSOL
treatments	B	Ca	Cu	Fe	K	Mg	Mn	Na	P	Zn
Control N	61.26	13600	12.98	95.97	53610	8898	23.88	500	6488	57.92
Control N	60.91	12530	13.22	98.9	52010	8433	22.31	524	6225	54.51
Control N	56.71	109.9	17.09	105.1	59610	6510	21.15	442.4	7430	52.36
Control N	59.22	11840	15	102.2	61820	6998	24.67	415.5	7513	56.91
Control N	61.45	16100	31.81	91.91	54440	14110	37.18	374.2	9350	26.14
Control N	88.52	18680	27.76	92.05	60440	15150	42.89	283.8	9367	28.38
Control N	65.88	16710	10.65	85.87	70030	14140	40.95	275.1	9458	28.62
Control N	89.15	16260	12.68	91.06	71150	13560	40.2	354.6	9450	28.18
Control N	59.37	13880	21.57	96.87	71870	8383	40.82	284.9	9769	55.02
Control N	59.54	13140	24.42	83.64	46470	8394	40.45	277.4	6621	53.35
Control N	60.77	11870	16.92	96.3	62910	8128	21.03	245	7458	49.06
GI	67.27	12450	23.11	105.3	64790	6359	66.18	270	5940	81.89
GI	68.27	12990	24.09	114.2	67760	6540	70.76	308.3	6289	90.51
GI	64.56	14670	15.9	116.6	58750	13730	72.9	425.8	6830	66.31
GI	75.11	14230	25.37	190.2	61890	13360	74.58	444.8	6851	77.54
GI	73.57	14260	29.87	145.6	76340	5775	78.94	307.4	6515	93.53
GI	62.04	12000	18.18	110.5	62150	5622	55.26	540.8	6328	65.2
GI	60.72	12110	20.97	107.3	63720	5474	54.89	787.4	6228	97.17
GE	60.64	13620	20.8	111.8	50910	8714	62.52	302.2	6744	93.06
GE	64.47	13930	14.32	127.5	52280	9376	67.77	373.7	7103	58.01
GE	61.13	13560	14.69	114.8	51710	9231	50.89	346.3	6824	46.75
GE	64.42	12800	21.49	112	50990	8764	47.62	332.9	6860	50.51
GE	63.94	13910	16.85	116.3	53440	10380	57.38	511.4	7085	52.68
GE	68.62	15690	18.86	127.4	62060	11630	64.41	601.3	8184	61.99
GE	59.07	12630	15.43	140.9	66150	8084	55.05	676.7	7379	47.47
GE	62.57	13060	15.88	131	64470	7752	54.65	706	7448	47.16
MM	59.43	10880	19.97	104.2	72480	5000	47.42	461.3	5747	62.76
MM	86.02	10860	17.05	100	75680	4905	44.76	501.1	5840	60.93
MM	63.54	11010	46.02	113.7	67980	5158	41.4	482.6	5849	101.6
MM	62.85	12330	45.87	130.9	72140	5798	47.47	484.4	6323	103.3
MM	68.48	20310	23.39	153.1	96950	12070	81.91	1147	10100	90.36
GM	61.45	14260	15.91	128.7	58560	10700	49.39	580.7	7426	54.64
GM	62.31	15680	16.19	122.8	60710	11090	52.29	623.3	7417	57.98
GM	60.14	14250	16.42	127.3	63760	9769	50.98	548.2	7371	62.78
GM	59.12	14140	16.56	122.3	62510	9404	47.5	502.3	7270	61.77
GM	60.07	14140	17.43	136	64440	11150	51.5	559	8725	55.35
GM	65.07	15320	49.36	185.5	78330	11820	54.1	510.4	8544	92.75
GM	61.96	13160	16.3	132.1	77440	9414	48.54	640.5	8805	72.74
GM	65.95	15740	20.05	148.4	75370	10120	56.05	570	9313	73.49
GM+P	50.39	14080	10.96	107.4	57990	11700	39.29	824.9	9086	48.44
GM+P	52.67	14490	9.091	120.1	58650	12760	44.78	896.2	9544	37.78
GM+P	50.98	12190	8.473	111.8	59310	11720	43.4	933	8362	44.75
GM+P	48.45	11450	8.893	109.6	56310	11200	41.91	826.9	8235	39.64
GM+P	52.56	13460	8.607	112.2	61350	9432	44.23	758.3	7730	42.68
GE+P	51.79	12000	7.709	112.6	57300	8706	42.43	862.2	7343	52.75
GE+P	51.69	11050	6.282	109.5	56350	6219	47.39	739.2	6275	50.47
GE+P	57.8	12210	9.289	133.2	61160	6621	51.56	892.1	6977	61.83
GE+P	52.26	14530	11.16	122.4	77020	12080	65.15	1138	8830	75.96
GI+P	54.91	16780	9.18	142.5	74810	12540	116.5	853.2	9316	63.35
GI+P	48.38	13410	10.72	108.5	71510	11090	76.63	1031	7627	61.14
GI+P	58.41	14030	11.86	126.5	72570	12360	85.31	965.1	8215	68.82
GI+P	60.72	14770	11.94	131.2	70250	13450	86.85	1097	10360	77.56
GI+P	55.12	16010	20.41	143.5	66780	13160	93.91	987.8	10140	84.54
MM+P	62.05	16230	11.78	156.8	82940	9878	47.47	914.5	9996	86.74
MM+P	54.88	15960	9.915	127.7	57820	10770	48.13	769.5	8429	67.44
MM+P	57.56	14660	8.679	146.4	75790	11720	50.59	2416	9583	71.77
Control P	64.63	14240	13.34	112.9	75320	6658	41.77	687.1	7331	109.4
Control P	53.41	12490	11.47	137.4	78350	6568	56.37	986.6	7506	53.09
Control P	53.76	14600	11.11	160.4	80230	7759	78.78	1025	9676	62.46
Control P	49.34	12880	6.738	121.4	57320	10040	28.68	897.7	7924	45.38
Control P	50.98	12220	7.659	109	56580	9837	29.49	832.4	7903	48.43

## Sheet: 48FSOL
treatments	B	Ca	Cu	Fe	K	Mg	Mn	Na	P	Zn
Control N	61.26	13600	12.98	95.97	53610	8898	23.88	500	6488	57.92
Control N	60.91	12530	13.22	98.9	52010	8433	22.31	524	6225	54.51
Control N	56.71	109.9	17.09	105.1	59610	6510	21.15	442.4	7430	52.36
Control N	59.22	11840	15	102.2	61820	6998	24.67	415.5	7513	56.91
Control N	61.45	16100	31.81	91.91	54440	14110	37.18	374.2	9350	26.14
Control N	88.52	18680	27.76	92.05	60440	15150	42.89	283.8	9367	28.38
Control N	65.88	16710	10.65	85.87	70030	14140	40.95	275.1	9458	28.62
Control N	89.15	16260	12.68	91.06	71150	13560	40.2	354.6	9450	28.18
Control N	59.37	13880	21.57	96.87	71870	8383	40.82	284.9	9769	55.02
Control N	59.54	13140	24.42	83.64	46470	8394	40.45	277.4	6621	53.35
Control N	60.77	11870	16.92	96.3	62910	8128	21.03	245	7458	49.06
GI	67.27	12450	23.11	105.3	64790	6359	66.18	270	5940	81.89
GI	68.27	12990	24.09	114.2	67760	6540	70.76	308.3	6289	90.51
GI	64.56	14670	15.9	116.6	58750	13730	72.9	425.8	6830	66.31
GI	75.11	14230	25.37	190.2	61890	13360	74.58	444.8	6851	77.54
GI	73.57	14260	29.87	145.6	76340	5775	78.94	307.4	6515	93.53
GI	62.04	12000	18.18	110.5	62150	5622	55.26	540.8	6328	65.2
GI	60.72	12110	20.97	107.3	63720	5474	54.89	787.4	6228	97.17
GE	64.47	13930	14.32	127.5	52280	9376	67.77	373.7	7103	58.01
GE	60.64	13620	20.8	111.8	50910	8714	62.52	302.2	6744	93.06
GE	61.13	13560	14.69	114.8	51710	9231	50.89	346.3	6824	46.75
GE	64.42	12800	21.49	112	50990	8764	47.62	332.9	6860	50.51
GE	63.94	13910	16.85	116.3	53440	10380	57.38	511.4	7085	52.68
GE	68.62	15690	18.86	127.4	62060	11630	64.41	601.3	8184	61.99
GE	59.07	12630	15.43	140.9	66150	8084	55.05	676.7	7379	47.47
GE	62.57	13060	15.88	131	64470	7752	54.65	706	7448	47.16
MM	59.43	10880	19.97	104.2	72480	5000	47.42	461.3	5747	62.76
MM	86.02	10860	17.05	100	75680	4905	44.76	501.1	5840	60.93
MM	63.54	11010	46.02	113.7	67980	5158	41.4	482.6	5849	101.6
MM	62.85	12330	45.87	130.9	72140	5798	47.47	484.4	6323	103.3
MM	68.48	20310	23.39	153.1	96950	12070	81.91	1147	10100	90.36
GM	61.45	14260	15.91	128.7	58560	10700	49.39	580.7	7426	54.64
GM	62.31	15680	16.19	122.8	60710	11090	52.29	623.3	7417	57.98
GM	60.14	14250	16.42	127.3	63760	9769	50.98	548.2	7371	62.78
GM	59.12	14140	16.56	122.3	62510	9404	47.5	502.3	7270	61.77
GM	60.07	14140	17.43	136	64440	11150	51.5	559	8725	55.35
GM	65.07	15320	49.36	185.5	78330	11820	54.1	510.4	8544	92.75
GM	61.96	13160	16.3	132.1	77440	9414	48.54	640.5	8805	72.74
GM	65.95	15740	20.05	148.4	75370	10120	56.05	570	9313	73.49
GM+P	56.6	13490	8.426	118	66270	9778	45.59	931.2	7717	46.17
GM+P	58.74	16920	9.695	137.1	78200	11950	121.2	1102	9526	74.2
GM+P	57.7	18640	12.12	121.1	86620	12170	93.31	1151	8115	58.37
GI+P	55.17	14400	12.69	119.2	82550	9707	119.3	994.7	7560	77.1
GI+P	51.5	14340	12.95	130.7	63200	7761	94.02	1021	7346	68.67
GE+P	64.97	15520	30.08	143.4	84350	5605	86.5	958.3	6422	87.04
GE+P	61.98	19360	11.78	145.2	80890	11330	94.59	1055	9615	81.99
GE+P	55.28	10730	8.715	115	69540	6404	70.12	703.8	6944	57.32
GE+P	54.38	11060	11.25	117.6	60990	6146	67.09	1949	7142	58.94
MM+P	56.85	15810	14.38	118.7	83330	11020	72	1388	9074	88.2
MM+P	55.02	13420	9.782	112	80980	9356	95.53	1206	8776	68.92
Control P	47.5	15002	14.2	130.3	65050	10005	72.3	985	7499	84.1
Control P	51.1	15150	14.4	125	73100	10102	78.7	1010	7585	80.5
Control P	53.9	15275	15.5	139.5	68250	10307	71.5	955	7710	78

## Sheet: 50MIX
Treatments	B	Ca	Cu	Fe	K	Mg	Mn	Na	P	Zn
Control N	61.26	13600	12.98	95.97	53610	8898	23.88	500	6488	57.92
Control N	60.91	12530	13.22	98.9	52010	8433	22.31	524	6225	54.51
Control N	56.71	109.9	17.09	105.1	59610	6510	21.15	442.4	7430	52.36
Control N	59.22	11840	15	102.2	61820	6998	24.67	415.5	7513	56.91
Control N	61.45	16100	31.81	91.91	54440	14110	37.18	374.2	9350	26.14
Control N	88.52	18680	27.76	92.05	60440	15150	42.89	283.8	9367	28.38
Control N	65.88	16710	10.65	85.87	70030	14140	40.95	275.1	9458	28.62
Control N	89.15	16260	12.68	91.06	71150	13560	40.2	354.6	9450	28.18
Control N	59.37	13880	21.57	96.87	71870	8383	40.82	284.9	9769	55.02
Control N	59.54	13140	24.42	83.64	46470	8394	40.45	277.4	6621	53.35
Control N	60.77	11870	16.92	96.3	62910	8128	21.03	245	7458	49.06
GI	67.27	12450	23.11	105.3	64790	6359	66.18	270	5940	81.89
GI	68.27	12990	24.09	114.2	67760	6540	70.76	308.3	6289	90.51
GI	64.56	14670	15.9	116.6	58750	13730	72.9	425.8	6830	66.31
GI	75.11	14230	25.37	190.2	61890	13360	74.58	444.8	6851	77.54
GI	62.04	12000	18.18	110.5	62150	5622	55.26	540.8	6328	65.2
GI	60.72	12110	20.97	107.3	63720	5474	54.89	787.4	6228	97.17
GI	73.57	14260	29.87	145.6	76340	5775	78.94	307.4	6515	93.53
GE	61.13	13560	14.69	114.8	51710	9231	50.89	346.3	6824	46.75
GE	64.42	12800	21.49	112	50990	8764	47.62	332.9	6860	50.51
GE	60.64	13620	20.8	111.8	50910	8714	62.52	302.2	6744	93.06
GE	63.94	13910	16.85	116.3	53440	10380	57.38	511.4	7085	52.68
GE	68.62	15690	18.86	127.4	62060	11630	64.41	601.3	8184	61.99
GE	59.07	12630	15.43	140.9	66150	8084	55.05	676.7	7379	47.47
GE	62.57	13060	15.88	131	64470	7752	54.65	706	7448	47.16
GE	63.94	13910	16.85	116.3	53440	10380	57.38	511.4	7085	52.68
GE	68.62	15690	18.86	127.4	62060	11630	64.41	601.3	8184	61.99
GE	59.07	12630	15.43	140.9	66150	8084	55.05	676.7	7379	47.47
GE	62.57	13060	15.88	131	64470	7752	54.65	706	7448	47.16
GE	64.47	13930	14.32	127.5	52280	9376	67.77	373.7	7103	58.01
GM	61.45	14260	15.91	128.7	58560	10700	49.39	580.7	7426	54.64
GM	62.31	15680	16.19	122.8	60710	11090	52.29	623.3	7417	57.98
GM	60.14	14250	16.42	127.3	63760	9769	50.98	548.2	7371	62.78
GM	59.12	14140	16.56	122.3	62510	9404	47.5	502.3	7270	61.77
GM	60.07	14140	17.43	136	64440	11150	51.5	559	8725	55.35
GM	65.07	15320	49.36	185.5	78330	11820	54.1	510.4	8544	92.75
GM	61.96	13160	16.3	132.1	77440	9414	48.54	640.5	8805	72.74
GM	65.95	15740	20.05	148.4	75370	10120	56.05	570	9313	73.49
MM	59.43	10880	19.97	104.2	72480	5000	47.42	461.3	5747	62.76
MM	86.02	10860	17.05	100	75680	4905	44.76	501.1	5840	60.93
MM	63.54	11010	46.02	113.7	67980	5158	41.4	482.6	5849	101.6
MM	62.85	12330	45.87	130.9	72140	5798	47.47	484.4	6323	103.3
MM	68.48	20310	23.39	153.1	96950	12070	81.91	1147	10100	90.36
GE+P	58.7	14530	22.84	128.6	67470	10650	55.72	513.9	7964	99.17
GE+P	59.04	13850	17.15	122.3	65150	107110	53.42	518.6	8258	47.83
GE+P	63.99	17290	14.96	146.6	74410	8134	78.77	662	7957	64.01
GE+P	64.67	12440	18.94	124.3	71720	7163	81.92	419.3	6972	60.46
GE+P	71.71	12840	70.27	125.1	74640	7317	82.1	373.3	7960	110.4
GI+P	61.38	16530	17.76	125.7	68230	11090	87.35	494.8	8376	58.9
GI+P	69.81	15780	38.51	122.1	73330	11010	85.34	400.6	8014	86.65
GI+P	63.72	15190	25.21	120.3	76540	11710	83.63	415	7863	71.74
GI+P	58.68	14850	24.9	122.5	73060	11950	83.1	406.3	7672	98.74
GI+P	59.47	15580	22.41	121.2	80020	10710	106.4	491.8	7173	107.2
GI+P	58	15270	20.5	123.5	77690	10550	106.3	523.9	7117	99.42
GM+P	57.27	13800	42.49	100.5	73110	9373	57.57	486	7068	68.08
GM+P	59.29	14020	43.34	90.14	76060	9022	56.06	433.8	7156	68.29
GM+P	68.31	10840	29.42	102.2	68260	7604	60.81	616.2	6104	58.84
GM+P	72.38	14700	7.993	96.31	62300	10590	48.99	588	7051	45.84
GM+P	68.68	14990	13.21	105.9	61350	10740	49.55	686.2	70146	53.57
Control P	83.89	15580	14.58	104.1	68430	11630	67.81	283.4	8394	66.08
Control P	66.8	15570	18.01	107.4	57730	11710	67.72	351.7	8508	66.62
Control P	67.31	9790	13.78	96.61	55020	5622	47.08	258.1	5774	48.35
Control P	59.18	11100	16.23	106.6	55890	5999	52.55	282.9	5732	54.36
Control P	60.46	10350	20.35	89.26	58790	6002	43.77	309.8	5744	42.02
Control P	61.84	11360	14.88	102.9	60940	7141	51.32	379.1	6038	46.84
MM+P	68.48	20310	23.39	153.1	96950	12070	81.91	1147	10100	90.36
MM+P	68.48	20310	23.39	153.1	96950	12070	81.91	1147	10100	90.36
MM+P	68.48	20310	23.39	153.1	96950	12070	81.91	1147	10100	90.36

## Sheet: 147 MIX
Treatments	B	Ca	Cu	Fe	K	Mg	Mn	Na	P	Zn
Control N	61.26	13600	12.98	95.97	53610	8898	23.88	500	6488	57.92
Control N	60.91	12530	13.22	98.9	52010	8433	22.31	524	6225	54.51
Control N	56.71	109.9	17.09	105.1	59610	6510	21.15	442.4	7430	52.36
Control N	59.22	11840	15	102.2	61820	6998	24.67	415.5	7513	56.91
Control N	61.45	16100	31.81	91.91	54440	14110	37.18	374.2	9350	26.14
Control N	88.52	18680	27.76	92.05	60440	15150	42.89	283.8	9367	28.38
Control N	65.88	16710	10.65	85.87	70030	14140	40.95	275.1	9458	28.62
Control N	89.15	16260	12.68	91.06	71150	13560	40.2	354.6	9450	28.18
Control N	59.37	13880	21.57	96.87	71870	8383	40.82	284.9	9769	55.02
Control N	59.54	13140	24.42	83.64	46470	8394	40.45	277.4	6621	53.35
Control N	60.77	11870	16.92	96.3	62910	8128	21.03	245	7458	49.06
GI	67.27	12450	23.11	105.3	64790	6359	66.18	270	5940	81.89
GI	68.27	12990	24.09	114.2	67760	6540	70.76	308.3	6289	90.51
GI	64.56	14670	15.9	116.6	58750	13730	72.9	425.8	6830	66.31
GI	75.11	14230	25.37	190.2	61890	13360	74.58	444.8	6851	77.54
GI	62.04	12000	18.18	110.5	62150	5622	55.26	540.8	6328	65.2
GI	60.72	12110	20.97	107.3	63720	5474	54.89	787.4	6228	97.17
GI	73.57	14260	29.87	145.6	76340	5775	78.94	307.4	6515	93.53
GE	61.13	13560	14.69	114.8	51710	9231	50.89	346.3	6824	46.75
GE	64.42	12800	21.49	112	50990	8764	47.62	332.9	6860	50.51
GE	60.64	13620	20.8	111.8	50910	8714	62.52	302.2	6744	93.06
GE	63.94	13910	16.85	116.3	53440	10380	57.38	511.4	7085	52.68
GE	68.62	15690	18.86	127.4	62060	11630	64.41	601.3	8184	61.99
GE	59.07	12630	15.43	140.9	66150	8084	55.05	676.7	7379	47.47
GE	62.57	13060	15.88	131	64470	7752	54.65	706	7448	47.16
GE	63.94	13910	16.85	116.3	53440	10380	57.38	511.4	7085	52.68
GE	68.62	15690	18.86	127.4	62060	11630	64.41	601.3	8184	61.99
GE	59.07	12630	15.43	140.9	66150	8084	55.05	676.7	7379	47.47
GE	62.57	13060	15.88	131	64470	7752	54.65	706	7448	47.16
GE	64.47	13930	14.32	127.5	52280	9376	67.77	373.7	7103	58.01
GM	61.45	14260	15.91	128.7	58560	10700	49.39	580.7	7426	54.64
GM	62.31	15680	16.19	122.8	60710	11090	52.29	623.3	7417	57.98
GM	60.14	14250	16.42	127.3	63760	9769	50.98	548.2	7371	62.78
GM	59.12	14140	16.56	122.3	62510	9404	47.5	502.3	7270	61.77
GM	60.07	14140	17.43	136	64440	11150	51.5	559	8725	55.35
GM	65.07	15320	49.36	185.5	78330	11820	54.1	510.4	8544	92.75
GM	61.96	13160	16.3	132.1	77440	9414	48.54	640.5	8805	72.74
GM	65.95	15740	20.05	148.4	75370	10120	56.05	570	9313	73.49
MM	59.43	10880	19.97	104.2	72480	5000	47.42	461.3	5747	62.76
MM	86.02	10860	17.05	100	75680	4905	44.76	501.1	5840	60.93
MM	63.54	11010	46.02	113.7	67980	5158	41.4	482.6	5849	101.6
MM	62.85	12330	45.87	130.9	72140	5798	47.47	484.4	6323	103.3
MM	68.48	20310	23.39	153.1	96950	12070	81.91	1147	10100	90.36
GE+P	58.7	14530	22.84	128.6	67470	10650	55.72	513.9	7964	99.17
GE+P	59.04	13850	17.15	122.3	65150	107110	53.42	518.6	8258	47.83
GE+P	63.99	17290	14.96	146.6	74410	8134	78.77	662	7957	64.01
GE+P	64.67	12440	18.94	124.3	71720	7163	81.92	419.3	6972	60.46
GE+P	71.71	12840	70.27	125.1	74640	7317	82.1	373.3	7960	110.4
GI+P	61.38	16530	17.76	125.7	68230	11090	87.35	494.8	8376	58.9
GI+P	69.81	15780	38.51	122.1	73330	11010	85.34	400.6	8014	86.65
GI+P	63.72	15190	25.21	120.3	76540	11710	83.63	415	7863	71.74
GI+P	58.68	14850	24.9	122.5	73060	11950	83.1	406.3	7672	98.74
GI+P	59.47	15580	22.41	121.2	80020	10710	106.4	491.8	7173	107.2
GI+P	58	15270	20.5	123.5	77690	10550	106.3	523.9	7117	99.42
GM+P	57.27	13800	42.49	100.5	73110	9373	57.57	486	7068	68.08
GM+P	59.29	14020	43.34	90.14	76060	9022	56.06	433.8	7156	68.29
GM+P	68.31	10840	29.42	102.2	68260	7604	60.81	616.2	6104	58.84
GM+P	72.38	14700	7.993	96.31	62300	10590	48.99	588	7051	45.84
GM+P	68.68	14990	13.21	105.9	61350	10740	49.55	686.2	70146	53.57
Control P	83.89	15580	14.58	104.1	68430	11630	67.81	283.4	8394	66.08
Control P	66.8	15570	18.01	107.4	57730	11710	67.72	351.7	8508	66.62
Control P	67.31	9790	13.78	96.61	55020	5622	47.08	258.1	5774	48.35
Control P	59.18	11100	16.23	106.6	55890	5999	52.55	282.9	5732	54.36
Control P	60.46	10350	20.35	89.26	58790	6002	43.77	309.8	5744	42.02
Control P	61.84	11360	14.88	102.9	60940	7141	51.32	379.1	6038	46.84
MM+P	64	20000	22	150	95000	11800	80	1100	10000	88
MM+P	70	20300	24	152	96500	12100	82	1150	10200	90
MM+P	69	20620	24	157	99400	12300	84	1200	10300	94
