# Supplementary material for: The effectiveness of arbuscular mycorrhizal fungal species (Funneliformis mosseae, Rhizophagus intraradices, and Claroideoglomus etunicatum) in the biocontrol of root and crown rot pathogens, Fusarium solani and Fusarium mixture in pepper
Source: PeerJ. 2025 Jan 16;13:e18438. doi: 10.7717/peerj.18438 (PMC11742253; doi:10.7717/peerj.18438)
Supplement: Supplemental Information 5 [file peerj-13-18438-s005.xlsx]

## Sheet: 18FSOL
treatments	SFW	SDW	RFW	RDW	RL	NL	RCD		treatments	SL
controlnegative	51.2	4.269	8.51	0.5707	32.925	32.25	4.0925		controlnegative	33.125
controlnegative	43.36	3.32	4.69	0.5216	26.425	23.25	3.48		controlnegative	34.7
controlnegative	52.05	3.7	7.39	0.6317	34.3	25.75	3.8875		controlnegative	37.9
controlnegative	44.89	5.22	4.25	1.355	24.6	25.25	4.6225		controlpositive	31.375
controlnegative	51.12	4.82	4.99	0.9881	26.6	23.25	4.14		controlpositive	43.85
controlnegative	41.09	4.22	7.76	1.1627	29.125	22	3.71		controlpositive	30.325
controlpositive	24.94	4.75	2.47	0.2865	18.9	19.25	3.8		controlpositive	29.125
controlpositive	29.96	2.25	2.19	0.3438	17.75	19.75	3.78		GMP	28.975
controlpositive	53.77	2.26	5.92	0.6218	32	28.5	4.74		GMP	50.1
controlpositive	30.52	2.37	5.74	0.884	28.875	18	3.49		GMP	34.925
GMP	45.61	5.4	7.24	0.8952	21.45	31.75	3.57		GIP	30.675
GMP	57.91	4.03	8.15	0.8772	24.625	28.75	4.24		GIP	42.7
GMP	41.98	5.39	7.76	0.9482	20.725	18.75	3.65		GIP	38.15
GIP	66.81	4.73	6.88	0.9157	21.05	31.25	3.98		GEP	28.025
GIP	54.83	4.33	8.2	1.0122	34.9333	30	4.12		GEP	31.25
GIP	61.28	5.27	4.31	0.3099	22.925	28	4.23		GEP	30.375
GEP	32.91	5.13	12.33	1.3374	37.25	22.75	3.81		MMP	27.5667
GEP	47.4	3.92	7.72	0.9026	23.925	23.25	3.71		MMP	22.4
GEP	60.72	4.5	8.04	0.8787	27	21	3.8		MMP	30.6
MMP	30.54	2	3.11	0.1856	24.5	24.33	3.4		GM	29.875
MMP	24.74	4.11	2.64	0.691	21.8667	18.33	3.02		GM	34.1
MMP	46.42	1.56	5.81	0.2378	31.5	31.33	3.32		GM	35.8
GM	44.93	4.4	5.36	0.7723	30.6667	30.25	3.29		GM	32.8
GM	52.4	4.42	6.69	0.7545	33.8333	32	3.23		GI	42.75
GM	46.94	4	6.48	0.5917	31.375	23.5	3.74		GI	32.35
GM	53.73	5	4.87	0.8854	33.1667	28.5	3.31		GI	33.575
GI	32.2	4.19	10.93	1.0532	24.6667	19.25	4.42		GI	32.825
GI	45.37	6.45	0.88	1.2314	27.8	38.75	3.43		GE	28.175
GI	63.48	2.75	11.12	1.8387	31.75	27.75	3.36		GE	37
GI	27.35	3.22	8.9	1.0568	38.5	21.25	3.95		GE	30.275
GE	48.3	4.8	11.73	0.8946	26	28	3.67		GE	31.5
GE	49.72	4.82	11.51	1.3628	33.375	19	3.66		MM	38.4333
GE	35.32	6.86	9.09	1.0668	31.875	23.5	3.85		MM	41.3333
GE	57.07	3.44	13.84	1.2918	31.75	33.5	3.51
MM	31.57	3.65	8.16	0.8267	37.0667	27	4.18
MM	40.25	2.9	8.53	0.7097	29.8333	24.6667	3.44

## Sheet: 48FSOL
treatments	SFW	SDW	RFW	RDW	RL	NL	RCD		treatments	SL
controlnegative	51.2	4.269	8.51	0.5707	32.925	32.25	4.0925		controlnegative	33.125
controlnegative	43.36	3.32	4.69	0.5216	26.425	23.25	3.48		controlnegative	34.7
controlnegative	52.05	3.7	7.39	0.6317	34.3	25.75	3.8875		controlnegative	37.9
controlnegative	44.89	5.22	4.25	1.355	24.6	25.25	4.6225		controlpositive	28.85
controlnegative	51.12	4.82	4.99	0.9881	26.6	23.25	4.14		controlpositive	38.075
controlnegative	41.09	4.22	7.76	1.1627	29.125	22	3.71		controlpositive	27.05
controlpositive	10.39	4.49	0.88	0.3033	13.05	11.25	2.48		controlpositive	26.975
controlpositive	60.2	0.95	7.21	0.4959	26.225	8	3.02		GMP	33.1
controlpositive	11.95	0.8	3.38	0.6399	25.425	19.05	4.11		GMP	26.3
controlpositive	13.15	1.25	4.79	0.1644	32.9	29.25	3.35		GMP	27.175
GMP	50.68	4.73	1.39	0.2652	18	21.6667	3.99		GIP	30.525
GMP	37.27	0.84	3.19	0.2058	26.2333	16.5	3.09		GIP	35.325
GMP	7.93	3.04	8.65	0.8689	33.825	37	3.57		GIP	28.05
GIP	46.53	4.31	1.08	0.5813	23	23.5	3.65		GEP	35.5
GIP	17.46	1.63	3.31	0.266	28.625	27	3.83		GEP	26.5
GIP	37.29	2.86	4.42	0.5213	25	13.75	3.35		GEP	20.5
GEP	16.29	1.56	5.94	0.5122	24.825	26.25	4.06		MMP	24.8333
GEP	43.03	4.1	5.15	0.4256	24.875	15.25	3.19		MMP	22.5333
GEP	40.7	3.2	6.77	0.666	22.3333	23.5	3.33		MMP	15.35
MMP	6.77	1.85	2.2	0.1351	18	24	3.17		GM	29.875
MMP	23.14	1.69	1.68	0.0652	12.0667	15.5	3.11		GM	34.1
MMP	23.05	0.57	0.91	0.1812	10.25	18.66	2.93		GM	35.8
GM	44.93	4.4	5.36	0.7723	30.6667	30.25	3.29		GM	32.8
GM	52.4	4.42	6.69	0.7545	33.8333	32	3.23		GI	42.75
GM	46.94	4	6.48	0.5917	31.375	23.5	3.74		GI	32.35
GM	53.73	5	4.87	0.8854	33.1667	28.5	3.31		GI	33.575
GI	32.2	4.19	10.93	1.0532	24.6667	19.25	4.42		GI	32.825
GI	45.37	6.45	0.88	1.2314	27.8	38.75	3.43		GE	28.175
GI	63.48	2.75	11.12	1.8387	31.75	27.75	3.36		GE	37
GI	27.35	3.22	8.9	1.0568	38.5	21.25	3.95		GE	30.275
GE	48.3	4.8	11.73	0.8946	26	28	3.67		GE	31.5
GE	49.72	4.82	11.51	1.3628	33.375	19	3.66		MM	38.4333
GE	35.32	6.86	9.09	1.0668	31.875	23.5	3.85		MM	41.3333
GE	57.07	3.44	13.84	1.2918	31.75	33.5	3.51
MM	31.57	3.65	8.16	0.8267	37.0667	27	4.18
MM	40.25	2.9	8.53	0.7097	29.8333	24.6667	3.44

## Sheet: 50MIX
treatments	SFW	SDW	RFW	RDW	RL	NL	RCD		treatments	SL
controlnegative	51.2	4.269	8.51	0.5707	32.925	32.25	4.0925		controlnegative	33.125
controlnegative	43.36	3.32	4.69	0.5216	26.425	23.25	3.48		controlnegative	34.7
controlnegative	52.05	3.7	7.39	0.6317	34.3	25.75	3.8875		controlnegative	37.9
controlnegative	44.89	5.22	4.25	1.355	24.6	25.25	4.6225		controlpositive	40.65
controlnegative	51.12	4.82	4.99	0.9881	26.6	23.25	4.14		controlpositive	30.625
controlnegative	41.09	4.22	7.76	1.1627	29.125	22	3.71		controlpositive	25.225
controlpositive	11.24	4.39	2.38	0.4451	15.075	26	3.63		controlpositive	32.375
controlpositive	43.36	3.26	8.25	0.96	35.6667	31	3.17		GMP	31.975
controlpositive	34.87	3.73	4.23	0.6182	21.475	14	4.15		GMP	36.125
controlpositive	46.5	1.06	7.01	1.1308	24.925	21	2.62		GMP	28.325
GMP	45.58	2.39	7.75	0.8571	27.7	30	3.84		GIP	33.85
GMP	27.7	5.07	9.4	0.3509	25.525	18	4.42		GIP	32.225
GMP	53.44	3.94	4.25	0.8506	21.225	24	3.1		GIP	31.175
GIP	40.1	3.05	6.26	0.9952	25.8	35.75	3.85		GEP	31.275
GIP	69.87	6.23	1.73	0.5496	37.25	25.75	3.49		GEP	26.525
GIP	53.5	4.33	1.93	0.4696	27.875	28.5	3.73		GEP	27.45
GEP	46.93	2.87	5.76	0.4125	36	27.25	4.11		MMP	17.9667
GEP	33.03	3.24	8.51	0.7446	26.5	22	3.67		MMP	21.5
GEP	36.61	4.48	9.13	0.9959	27.6	21.25	3.59		MMP	25.5333
MMP	19.48	1.4	2.13	0.0841	23.3333	26	2.66		GM	29.875
MMP	3.93	0.34	1.06	0.2168	26.5	16	2.74		GM	34.1
MMP	7.24	0.66	1.93	0.1504	20.9667	13	3.06		GM	35.8
GM	44.93	4.4	5.36	0.7723	30.6667	30.25	3.29		GM	32.8
GM	52.4	4.42	6.69	0.7545	33.8333	32	3.23		GI	42.75
GM	46.94	4	6.48	0.5917	31.375	23.5	3.74		GI	32.35
GM	53.73	5	4.87	0.8854	33.1667	28.5	3.31		GI	33.575
GI	32.2	4.19	10.93	1.0532	24.6667	19.25	4.42		GI	32.825
GI	45.37	6.45	0.88	1.2314	27.8	38.75	3.43		GE	28.175
GI	63.48	2.75	11.12	1.8387	31.75	27.75	3.36		GE	37
GI	27.35	3.22	8.9	1.0568	38.5	21.25	3.95		GE	30.275
GE	48.3	4.8	11.73	0.8946	26	28	3.67		GE	31.5
GE	49.72	4.82	11.51	1.3628	33.375	19	3.66		MM	38.4333
GE	35.32	6.86	9.09	1.0668	31.875	23.5	3.85		MM	41.3333
GE	57.07	3.44	13.84	1.2918	31.75	33.5	3.51
MM	31.57	3.65	8.16	0.8267	37.0667	27	4.18
MM	40.25	2.9	8.53	0.7097	29.8333	24.6667	3.44

## Sheet: 147MIX
treatments	SFW	SDW	RFW	RDW	RL	NL	RCD		treatments	SL
controlnegative	51.2	4.269	8.51	0.5707	32.925	32.25	4.0925		controlnegative	33.125
controlnegative	43.36	3.32	4.69	0.5216	26.425	23.25	3.48		controlnegative	34.7
controlnegative	52.05	3.7	7.39	0.6317	34.3	25.75	3.8875		controlnegative	37.9
controlnegative	44.89	5.22	4.25	1.355	24.6	25.25	4.6225		controlpositive	26.675
controlnegative	51.12	4.82	4.99	0.9881	26.6	23.25	4.14		controlpositive	33.625
controlnegative	41.09	4.22	7.76	1.1627	29.125	22	3.71		controlpositive	34.8
controlpositive	44.68	4.7	4.39	0.6913	26.125	31.3333	3.3		controlpositive	28
controlpositive	41.6	1.99	7.24	0.3468	31.6333	22	3.88		GMP	13
controlpositive	56.04	3.2	2.88	0.955	20.2	30.5	4.37		GMP	46.8
controlpositive	21.47	2.95	2.81	0.4757	21.3	15.5	3.97		GMP	36.025
GMP	53.11	4.63	0.04	0.8041	7	53	5.17		GIP	25.55
GMP	54.5	5.01	5.2	0.6346	24.15	32	3.55		GIP	27.325
GMP	1.1	0.16	6.24	0.8987	33.5	5.5			GIP	30.2
GIP	31.89	1.84	3.65	0.2933	26.1	18.75	3.34		GEP	27.45
GIP	19.02	2.46	1.15	0.4483	16.975	15	3.38		GEP	28.5
GIP	21.61	1.7	1.53	0.1702	24.7333	17	3.29		GEP	22.875
GEP	16.77	1.88	8.03	0.5568	24.2	15.5	3.47		MMP	22.1
GEP	18.79	1.7	8.02	0.7642	31.25	13.75	3.23		MMP	21.2333
GEP	20.62	3.05	8.3	0.75	32.1667	12.75	2.63		MMP	27.2667
MMP	16.22	2.9	7.89	0.189	23.9	19	2.68		GM	29.875
MMP	35.92	0.58	3.36	0.6081	21.1	29.33	2.22		GM	34.1
MMP	7.06	1.2	2.06	0.2743	17.1	11	3.05		GM	35.8
GM	44.93	4.4	5.36	0.7723	30.6667	30.25	3.29		GM	32.8
GM	52.4	4.42	6.69	0.7545	33.8333	32	3.23		GI	42.75
GM	46.94	4	6.48	0.5917	31.375	23.5	3.74		GI	32.35
GM	53.73	5	4.87	0.8854	33.1667	28.5	3.31		GI	33.575
GI	32.2	4.19	10.93	1.0532	24.6667	19.25	4.42		GI	32.825
GI	45.37	6.45	0.88	1.2314	27.8	38.75	3.43		GE	28.175
GI	63.48	2.75	11.12	1.8387	31.75	27.75	3.36		GE	37
GI	27.35	3.22	8.9	1.0568	38.5	21.25	3.95		GE	30.275
GE	48.3	4.8	11.73	0.8946	26	28	3.67		GE	31.5
GE	49.72	4.82	11.51	1.3628	33.375	19	3.66		MM	38.4333
GE	35.32	6.86	9.09	1.0668	31.875	23.5	3.85		MM	41.3333
GE	57.07	3.44	13.84	1.2918	31.75	33.5	3.51
MM	31.57	3.65	8.16	0.8267	37.0667	27	4.18
MM	40.25	2.9	8.53	0.7097	29.8333	24.6667	3.44
