# Supplementary material for: The effectiveness of arbuscular mycorrhizal fungal species (Funneliformis mosseae, Rhizophagus intraradices, and Claroideoglomus etunicatum) in the biocontrol of root and crown rot pathogens, Fusarium solani and Fusarium mixture in pepper
Source: PeerJ. 2025 Jan 16;13:e18438. doi: 10.7717/peerj.18438 (PMC11742253; doi:10.7717/peerj.18438)
Supplement: Supplemental Information 6 [file peerj-13-18438-s006.xlsx]

## Sheet: kontrol
		Disease scale	0-4 scale (Yao et al., 2002)		burcu arslanpay-semra demir,2014) modified	Harvest Results Report	2016-02-18
		Group Name	Fully dried, dead—4	Stem darkening—3	Severe yellowing, wilting, stunting in leaves—2	Leaf deformation, mild wilting—1	No symptoms—0
4th Week	1st replicate	Kontrol 48 F.solani			2				50			((2*1)+(2*1)+(2*1))*(100)/(3*4)
	2nd replicate	Kontrol 48 F.solani		3					50			((3*1)+(2*1)+(2*1))*(100)/(3*4)
	3rd replicate	Kontrol 48 F.solani	4						75			((4*1)+(2*1)+(3*1))*(100)/(3*4)
	4th replicate	Kontrol 48 F.solani			2				50			((2*1)+(2*1)+(2*1))*(100)/(3*4)
5th Week	1st replicate	Kontrol 48 F.solani			2
	2nd replicate	Kontrol 48 F.solani			2
	3rd replicate	Kontrol 48 F.solani			2
	4th replicate	Kontrol 48 F.solani			2
7th Week	1st replicate	Kontrol 48 F.solani			2
	2nd replicate	Kontrol 48 F.solani				1
	3rd replicate	Kontrol 48 F.solani		3
	4th replicate	Kontrol 48 F.solani			2

## Sheet: Gmossae
		Disease scale	0-4 scale (Yao et al., 2002)		burcu arslanpay-semra demir,2014) modified	Harvest Results Report	2016-02-18
		Group Name	Fully dried, dead—4	Stem darkening—3	Severe yellowing, wilting, stunting in leaves—2	Leaf deformation, mild wilting—1	No symptoms—0
4th Week	1st replicate	G.mosseae 48 F.solani				1			25
	2nd replicate	G.mosseae 48 F.solani	4						91.67
	3rd replicate	G.mosseae 48 F.solani			2				41.67
		G.mosseae 48 F.solani					0
5th Week	1st replicate	G.mosseae 48 F.solani	4
	2nd replicate	G.mosseae 48 F.solani			2
	3rd replicate
	4th replicate
7th Week	1st replicate	G.mosseae 48 F.solani			2
	2nd replicate	G.mosseae 48 F.solani		3
	3rd replicate	G.mosseae 48 F.solani				1

## Sheet: Gi
		Disease scale	0-4 scale (Yao et al., 2002)		burcu arslanpay-semra demir,2014) modified	Harvest Results Report	2016-02-18
		Group Name	Fully dried, dead—4	Stem darkening—3	Severe yellowing, wilting, stunting in leaves—2	Leaf deformation, mild wilting—1	No symptoms—0
4th Week	1st replicate	G.intraradices 48 F.solani			2					33.33
	2nd replicate	G.intraradices 48 F.solani			2					41.67
	3rd replicate	G.intraradices 48 F.solani			2					58.33
	4th replicate
5th Week	1st replicate	G.intraradices 48 F.solani			2
	2nd replicate	G.intraradices 48 F.solani			2
	3rd replicate	G.intraradices 48 F.solani			2
	4th replicate
7th Week	1st replicate	G.intraradices 48 F.solani					0
	2nd replicate	G.intraradices 48 F.solani				1
	3rd replicate	G.intraradices 48 F.solani		3
	4th replicate

## Sheet: Ge
		Disease scale	0-4 scale (Yao et al., 2002)		burcu arslanpay-semra demir,2014) modified	Harvest Results Report	2016-02-18
		Group Name	Fully dried, dead—4	Stem darkening—3	Severe yellowing, wilting, stunting in leaves—2	Leaf deformation, mild wilting—1	No symptoms—0
4th Week	1st replicate	G. etunicatum 48 F.solani			2				41.67
	2nd replicate	G. etunicatum 48 F.solani			2				41.67
	3rd replicate	G. etunicatum 48 F.solani			2				33.33
	4th replicate
5th Week	1st replicate	G. etunicatum 48 F.solani			2
	2nd replicate	G. etunicatum 48 F.solani			2
	3rd replicate	G. etunicatum 48 F.solani			2
	4th replicate
7th Week	1st replicate	G. etunicatum 48 F.solani				1
	2nd replicate	G. etunicatum 48 F.solani				1
	3rd replicate	G. etunicatum 48 F.solani					0
	4th replicate

## Sheet: MMix
		Disease scale	0-4 scale (Yao et al., 2002)		burcu arslanpay-semra demir,2014) modified	Harvest Results Report	2016-02-18
		Group Name	Fully dried, dead—4	Stem darkening—3	Severe yellowing, wilting, stunting in leaves—2	Leaf deformation, mild wilting—1	No symptoms—0
4th Week	1st replicate	Mikoriza mix 48 F.solani			2				33.33
	2nd replicate	Mikoriza mix 48 F.solani			2				41.67
	3rd replicate	Mikoriza mix 48 F.solani	4						83.33
5th Week	1st replicate	Mikoriza mix 48 F.solani			2
	2nd replicate	Mikoriza mix 48 F.solani			2
	3rd replicate	Mikoriza mix 48 F.solani	4
7th Week	1st replicate	Mikoriza mix 48 F.solani					0
	2nd replicate	Mikoriza mix 48 F.solani				1
	3rd replicate	Mikoriza mix 48 F.solani			2

## Sheet: MİNİTAB
					Kontrol 48 F.solani	50
					Kontrol 48 F.solani	50
					Kontrol 48 F.solani	75
					Kontrol 48 F.solani	50
					G.mosseae 48 F.solani	25
					G.mosseae 48 F.solani	91.67
					G.mosseae 48 F.solani	41.67
					G.intraradices 48 F.solani	33.33
					G.intraradices 48 F.solani	41.67
					G.intraradices 48 F.solani	58.33
					G. etunicatum 48 F.solani	41.67
					G. etunicatum 48 F.solani	41.67
					G. etunicatum 48 F.solani	33.33
					Mikoriza mix 48 F.solani	33.33
					Mikoriza mix 48 F.solani	41.67
					Mikoriza mix 48 F.solani	83.33
