# Supplementary material for: The effectiveness of arbuscular mycorrhizal fungal species (Funneliformis mosseae, Rhizophagus intraradices, and Claroideoglomus etunicatum) in the biocontrol of root and crown rot pathogens, Fusarium solani and Fusarium mixture in pepper
Source: PeerJ. 2025 Jan 16;13:e18438. doi: 10.7717/peerj.18438 (PMC11742253; doi:10.7717/peerj.18438)
Supplement: Supplemental Information 7 [file peerj-13-18438-s007.xlsx]

## Sheet: week4
Disease scale (5. Week)	0-4 scale (Yao et al., 2002)		burcu arslanpay-semra demir,2014) modified	Harvest Results Report	2016-02-01
Group name	Fully dried, dead—4	Stem darkening—3	Severe yellowing, wilting, stunting in leaves—2	Leaf deformation, mild wilting—1	No symptoms—0	sum
Kontrol 147 mix					0	0
Kontrol 147 mix		3	2			5
Kontrol 147 mix		3	2	1		6
Kontrol 147 mix		3	2			5
G. mosseae 147 mix	4	3		1		8
G. mosseae 147 mix	4		2			6
G. mosseae 147 mix			2			2
G.intraradices 147 mix			2			2
G.intraradices 147 mix			2			2
G.intraradices 147 mix			2			2
G.etunicatum 147 mix			2	1		3
G.etunicatum 147 mix			2	1		3
G.etunicatum 147 mix			2			2
Mikoriza mix 147 mix			2	1		3
Mikoriza mix 147 mix			2			2
Mikoriza mix 147 mix			2			2

## Sheet: week5
Disease scale (5. Week)	0-4 scale (Yao et al., 2002)		burcu arslanpay-semra demir,2014) modified	Harvest Results Report	2016-02-01
Group name	Fully dried, dead—4	Stem darkening—3	Severe yellowing, wilting, stunting in leaves—2	Leaf deformation, mild wilting—1	No symptoms—0
Kontrol 147 mix					0	0
Kontrol 147 mix			2			2
Kontrol 147 mix		3	2			5
Kontrol 147 mix		3	2			5
G. mosseae 147 mix	4	3	2	1		10
G. mosseae 147 mix	4	3	2			9
G. mosseae 147 mix			2			2
G.intraradices 147 mix			2	1		3
G.intraradices 147 mix			2	1		3
G.intraradices 147 mix			2	1		3
G.etunicatum 147 mix			2	1		3
G.etunicatum 147 mix			2	1		3
G.etunicatum 147 mix			2	1		3
Mikoriza mix 147 mix			2	1		3
Mikoriza mix 147 mix			2	1		3
Mikoriza mix 147 mix			2			2

## Sheet: week7
Disease scale	0-4 scale (Yao et al., 2002)		burcu arslanpay-semra demir,2014) modified	Harvest Results Report	2016-02-01
Group name	Fully dried, dead—4	Stem darkening—3	Severe yellowing, wilting, stunting in leaves—2	Leaf deformation, mild wilting—1	No symptoms—0	sum
Kontrol 147 mix				1		1
Kontrol 147 mix				1		1
Kontrol 147 mix			2			2
Kontrol 147 mix				1		1
G. mosseae 147 mix	4			1		5
G. mosseae 147 mix		3				3
G. mosseae 147 mix				1		1
G.intraradices 147 mix			2			2
G.intraradices 147 mix			2			2
G.intraradices 147 mix		3				3
G.etunicatum 147 mix					0	0
G.etunicatum 147 mix					0	0
G.etunicatum 147 mix					0	0
Mikoriza mix 147 mix				1		1
Mikoriza mix 147 mix				1		1
Mikoriza mix 147 mix				1		1

## Sheet: 147mix
Disease scale	0-4 scale (Yao et al., 2002)		burcu arslanpay-semra demir,2014) modified	Harvest Results Report	2016-02-01
Group Name	Fully dried, dead—4	Stem darkening—3	Severe yellowing, wilting, stunting in leaves—2	Leaf deformation, mild wilting—1	No symptoms—0	sum
Kontrol 147 mix					0	0
Kontrol 147 mix		3	2			5		50
Kontrol 147 mix		3	2	1		6		66.66
Kontrol 147 mix		3	2			5		58.33
Kontrol 147 mix					0	0
Kontrol 147 mix			2			2
Kontrol 147 mix		3	2			5
Kontrol 147 mix		3	2			5
Kontrol 147 mix				1		1
Kontrol 147 mix				1		1
Kontrol 147 mix			2			2
Kontrol 147 mix				1		1

## Sheet: GMos_147mix
Disease scale	0-4 scale (Yao et al., 2002)		burcu arslanpay-semra demir,2014) modified	Harvest Results Report	2016-02-18
Group Name	Fully dried, dead—4	Stem darkening—3	Severe yellowing, wilting, stunting in leaves—2	Leaf deformation, mild wilting—1	No symptoms—0	sum
G. mosseae 147 mix	4	3		1		8		100
G. mosseae 147 mix	4		2			6		91.66
G. mosseae 147 mix			2			2		41.66
G. mosseae 147 mix	4	3	2	1		10
G. mosseae 147 mix	4	3	2			9
G. mosseae 147 mix			2			2
G. mosseae 147 mix	4			1		5
G. mosseae 147 mix		3				3
G. mosseae 147 mix				1		1

## Sheet: Gi_147mix
Disease scale	0-4 scale (Yao et al., 2002)		burcu arslanpay-semra demir,2014) modified	Harvest Results Report	2016-02-18
Group Name	Fully dried, dead—4	Stem darkening—3	Severe yellowing, wilting, stunting in leaves—2	Leaf deformation, mild wilting—1	No symptoms—0	sum
G.intraradices 147 mix			2			2		50
G.intraradices 147 mix			2			2		50
G.intraradices 147 mix			2			2		58.33
G.intraradices 147 mix			2	1		3
G.intraradices 147 mix			2	1		3
G.intraradices 147 mix			2	1		3
G.intraradices 147 mix			2			2
G.intraradices 147 mix			2			2
G.intraradices 147 mix		3				3

## Sheet: GE_147mix
Disease scale	0-4 scale (Yao et al., 2002)		burcu arslanpay-semra demir,2014) modified	Harvest Results Report	2016-02-18
Group Name	Fully dried, dead—4	Stem darkening—3	Severe yellowing, wilting, stunting in leaves—2	Leaf deformation, mild wilting—1	No symptoms—0	sum
G.etunicatum 147 mix			2	1		3		33.33
G.etunicatum 147 mix			2	1		3		33.33
G.etunicatum 147 mix			2			2		33.33
G.etunicatum 147 mix			2	1		3
G.etunicatum 147 mix			2	1		3
G.etunicatum 147 mix			2	1		3
G.etunicatum 147 mix					0	0
G.etunicatum 147 mix					0	0
G.etunicatum 147 mix					0	0

## Sheet: mix_147
Disease scale	0-4 scale (Yao et al., 2002)		burcu arslanpay-semra demir,2014) modified	Harvest Results Report	2016-02-18
Group Name	Fully dried, dead—4	Stem darkening—3	Severe yellowing, wilting, stunting in leaves—2	Leaf deformation, mild wilting—1	No symptoms—0
						sum		dseverity
Mikoriza mix 147 mix			2	1		3		41.66
Mikoriza mix 147 mix			2			2		41.66
Mikoriza mix 147 mix			2			2		41.66
Mikoriza mix 147 mix			2	1		3
Mikoriza mix 147 mix			2	1		3
Mikoriza mix 147 mix			2			2
Mikoriza mix 147 mix				1		1
Mikoriza mix 147 mix				1		1
Mikoriza mix 147 mix				1		1

## Sheet: Sayfa9
	Kont147mix	50	1
	Kont147mix	66.66	1
	Kont147mix	58.33	1
	GMos147mix	100	2
	GMos147mix	91.66	2
	GMos147mix	41.66	2
	Gi147mix	50	3
	Gi147mix	50	3
	Gi147mix	58.33	3
	GE147mix	33.33	4
	GE147mix	33.33	4
	GE147mix	33.33	4
	Mix147	41.66	5
	Mix148	41.66	5
	Mix149	41.66	5
