# Supplementary material for: The effectiveness of arbuscular mycorrhizal fungal species (Funneliformis mosseae, Rhizophagus intraradices, and Claroideoglomus etunicatum) in the biocontrol of root and crown rot pathogens, Fusarium solani and Fusarium mixture in pepper
Source: PeerJ. 2025 Jan 16;13:e18438. doi: 10.7717/peerj.18438 (PMC11742253; doi:10.7717/peerj.18438)
Supplement: Supplemental Information 8 [file peerj-13-18438-s008.xlsx]

## Sheet: control
Disease scale	0-4 scale (Yao et al., 2002)		burcu arslanpay-semra demir,2014) modified	Harvest Results Report	2016-02-18
Group Name	Fully dried, dead—4	Stem darkening—3	Severe yellowing, wilting, stunting in leaves—2	Leaf deformation, mild wilting—1	No symptoms—0
Kontrol 50 mix		3						33.33
Kontrol 50 mix			2					25
Kontrol 50 mix			2					33.33
Kontrol 50 mix		3						50
Kontrol 50 mix					0
Kontrol 50 mix					0
Kontrol 50 mix					0
Kontrol 50 mix			2
Kontrol 50 mix				1
Kontrol 50 mix				1
Kontrol 50 mix			2
Kontrol 50 mix				1

## Sheet: Gmossea
Disease scale	0-4 scale (Yao et al., 2002)		burcu arslanpay-semra demir,2014) modified	Harvest Results Report	2016-02-18
Group Name	Fully dried, dead—4	Stem darkening—3	Severe yellowing, wilting, stunting in leaves—2	Leaf deformation, mild wilting—1	No symptoms—0
G.mosseae 50 mix			2				33.33
G.mosseae 50 mix			2				41.66
G.mosseae 50 mix			2				41.66
G.mosseae 50 mix			2
G.mosseae 50 mix			2
G.mosseae 50 mix			2
G.mosseae 50 mix					0
G.mosseae 50 mix				1
G.mosseae 50 mix				1

## Sheet: GIntraradices
Disease scale	0-4 scale (Yao et al., 2002)		burcu arslanpay-semra demir,2014) modified	Harvest Results Report	2016-02-18
Group Name	Fully dried, dead—4	Stem darkening—3	Severe yellowing, wilting, stunting in leaves—2	Leaf deformation, mild wilting—1	No symptoms—0
G.intraradices 50 mix			2					50
G.intraradices 50 mix					0			8.33
G.intraradices 50 mix			2					50
G.intraradices 50 mix		3
G.intraradices 50 mix					0
G.intraradices 50 mix		3
G.intraradices 50 mix				1
G.intraradices 50 mix				1
G.intraradices 50 mix				1

## Sheet: Getanicum
Disease scale	0-4 scale (Yao et al., 2002)		burcu arslanpay-semra demir,2014) modified	Harvest Results Report	2016-02-18
Group Name	Fully dried, dead—4	Stem darkening—3	Severe yellowing, wilting, stunting in leaves—2	Leaf deformation, mild wilting—1	No symptoms—0
G.etunicatum 50 mix			2					41.66
G.etunicatum 50 mix			2					41.66
G.etunicatum 50 mix			2					41.66
G.etunicatum 50 mix			2
G.etunicatum 50 mix			2
G.etunicatum 50 mix		3
G.etunicatum 50 mix				1
G.etunicatum 50 mix				1
G.etunicatum 50 mix					0

## Sheet: MMix
Disease scale	0-4 scale (Yao et al., 2002)		burcu arslanpay-semra demir,2014) modified	Harvest Results Report	2016-02-18
Group Name	Fully dried, dead—4	Stem darkening—3	Severe yellowing, wilting, stunting in leaves—2	Leaf deformation, mild wilting—1	No symptoms—0
Mikoriza mix 50 mix			2			50
Mikoriza mix 50 mix	4					91.66
Mikoriza mix 50 mix		3				58.33
Mikoriza mix 50 mix			2
Mikoriza mix 50 mix	4
Mikoriza mix 50 mix			2
Mikoriza mix 50 mix			2
Mikoriza mix 50 mix		3
Mikoriza mix 50 mix			2

## Sheet: Sayfa6
Kontrol 50 mix		33.33
Kontrol 50 mix		25
Kontrol 50 mix		33.33
Kontrol 50 mix		50
G.mosseae 50 mix		33.33
G.mosseae 50 mix		41.66
G.mosseae 50 mix		41.66
G.intraradices 50 mix		50
G.intraradices 50 mix		8.33
G.intraradices 50 mix		50
G.etunicatum 50 mix		41.66
G.etunicatum 50 mix		41.66
G.etunicatum 50 mix		41.66
Mikoriza mix 50 mix		50
Mikoriza mix 50 mix		91.66
Mikoriza mix 50 mix		58.33
