# Supplementary material for: The effectiveness of arbuscular mycorrhizal fungal species (Funneliformis mosseae, Rhizophagus intraradices, and Claroideoglomus etunicatum) in the biocontrol of root and crown rot pathogens, Fusarium solani and Fusarium mixture in pepper
Source: PeerJ. 2025 Jan 16;13:e18438. doi: 10.7717/peerj.18438 (PMC11742253; doi:10.7717/peerj.18438)
Supplement: Supplemental Information 9 [file peerj-13-18438-s009.xlsx]

## Sheet: kontrol
Disease scale (7. Week)	0-4 scale (Yao et al., 2002)		burcu arslanpay-semra demir,2014) modified	Harvest Results Report	2016-02-18
Group name	Fully dried, dead—4	Stem darkening—3	Severe yellowing, wilting, stunting in leaves—2	Leaf deformation, mild wilting—1	No symptoms—0
Kontrol 18 F.solani			2	1		3		33.33
Kontrol 18 F.solani				1		1		25
Kontrol 18 F.solani					0	0		0
Kontrol 18 F.solani					0	0		25
Kontrol 18 F.solani				1		1
Kontrol 18 F.solani			2	1		3
Kontrol 18 F.solani					0	0
Kontrol 18 F.solani			2			2
Kontrol 18 F.solani				1		1
Kontrol 18 F.solani					0	0
Kontrol 18 F.solani				1		1
Kontrol 18 F.solani				1		1

## Sheet: gmosae
	0-4 scale (Yao et al., 2002)		burcu arslanpay-semra demir,2014) modified	Harvest Results Report	2016-02-18
	Fully dried, dead—4	Stem darkening—3	Severe yellowing, wilting, stunting in leaves—2	Leaf deformation, mild wilting—1	No symptoms—0
G.mosseae 18 F.solani			2			2		16.67
G.mosseae 18 F.solani			2			2		33.33
G.mosseae 18 F.solani					0	0		8.33
G.mosseae 18 F.solani					0	0
G.mosseae 18 F.solani			2			2
G.mosseae 18 F.solani					0	0
G.mosseae 18 F.solani					0	0
G.mosseae 18 F.solani					0	0
G.mosseae 18 F.solani				1		1

## Sheet: gintradices
	0-4 scale (Yao et al., 2002)		burcu arslanpay-semra demir,2014) modified	Harvest Results Report	2016-02-18
	Fully dried, dead—4	Stem darkening—3	Severe yellowing, wilting, stunting in leaves—2	Leaf deformation, mild wilting—1	No symptoms—0
G.intraradices 18 F.solani					0		0
G.intraradices 18 F.solani			2				33.33
G.intraradices 18 F.solani					0		16.67
G.intraradices 18 F.solani					0
G.intraradices 18 F.solani			2
G.intraradices 18 F.solani			2
G.intraradices 18 F.solani					0
G.intraradices 18 F.solani					0
G.intraradices 18 F.solani					0

## Sheet: etanic
	0-4 scale (Yao et al., 2002)		burcu arslanpay-semra demir,2014) modified	Harvest Results Report	2016-02-18
	Fully dried, dead—4	Stem darkening—3	Severe yellowing, wilting, stunting in leaves—2	Leaf deformation, mild wilting—1	No symptoms—0
G. etunicatum 18 F.solani		3					41.67
G. etunicatum 18 F.solani					0		0
G. etunicatum 18 F.solani					0		0
G. etunicatum 18 F.solani			2
G. etunicatum 18 F.solani					0
G. etunicatum 18 F.solani					0
G. etunicatum 18 F.solani					0
G. etunicatum 18 F.solani					0
G. etunicatum 18 F.solani					0

## Sheet: mmixes
	0-4 scale (Yao et al., 2002)		burcu arslanpay-semra demir,2014) modified	Harvest Results Report	2016-02-18
	Fully dried, dead—4	Stem darkening—3	Severe yellowing, wilting, stunting in leaves—2	Leaf deformation, mild wilting—1	No symptoms—0
Mikoriza mix 18 F.solani					0		8.33
Mikoriza mix 18 F.solani			2				41.67
Mikoriza mix 18 F.solani					0		8.33
Mikoriza mix 18 F.solani				1
Mikoriza mix 18 F.solani			2
Mikoriza mix 18 F.solani					0
Mikoriza mix 18 F.solani					0
Mikoriza mix 18 F.solani				1
Mikoriza mix 18 F.solani				1

## Sheet: Sayfa6
			name	ds	group
			negatifkontrol	0	0
			negatifkontrol	0	0
			negatifkontrol	0	0
			Kont18FSol	33.33	1
			Kont18FSol	25	1
			Kont18FSol	0	1
			Kont18FSol	25	1
			GMos18FSol	16.67	2
			GMos18FSol	33.33	2
			GMos18FSol	8.33	2
			Gi18FSol	0	3
			Gi18FSol	33.33	3
			Gi18FSol	16.67	3
			GE18FSol	41.67	4
			GE18FSol	0	4
			GE18FSol	0	4
			Mix18FSol	8.33	5
			Mix18FSol	41.67	5
			Mix18FSol	8.33	5
