# Supplementary material for: The effectiveness of arbuscular mycorrhizal fungal species (Funneliformis mosseae, Rhizophagus intraradices, and Claroideoglomus etunicatum) in the biocontrol of root and crown rot pathogens, Fusarium solani and Fusarium mixture in pepper
Source: PeerJ. 2025 Jan 16;13:e18438. doi: 10.7717/peerj.18438 (PMC11742253; doi:10.7717/peerj.18438)
Supplement: Supplemental Information 10 [file peerj-13-18438-s010.xlsx]

## Sheet: Sayfa1
							Plant Nutrients
				B	Ca	Cu	Fe	K	Mg	Mn	Na	P	Zn
			Mycorrhiza	ns	**	ns	**	**	ns	**	**	ns	**
			Pathogen	**	*	**	ns	*	ns	**	**	ns	*
			Mycorrhiza * Pathogen	ns	**	ns	**	*	ns	**	ns	ns	ns
							Morphological Parameters
				SFW	SDW	RFW	RDW	RL	NL	RCD	SL
			Mycorrhiza	**	**	**	**	*	ns	*	**
			Pathogen	**	**	**	**	ns	ns	ns	*
			Mycorrhiza * Pathogen	ns	ns	ns	ns	ns	ns	ns	ns
							Growth Parameters
				pH	EC	P	K	Cu	Fe	Mn	Zn	TN
			Mycorrhiza	*	**	*	**	*	ns	**	**	*
			Pathogen	ns	*	ns	ns	ns	ns	ns	ns	ns
			Mycorrhiza * Pathogen	ns	ns	ns	**	ns	ns	ns	ns	ns
				Total spores	Root colonization
			Mycorrhiza	ns	*
			Pathogen	ns	ns
			Mycorrhiza * Pathogen	ns	ns
